# Supplementary material
Source: publisher site journal article supplement (https://www.spandidos-publications.com/6661/downloadSupplementary)
Supplement: Supplementary file 1 [file downloadSupplementary]

## Sheet: Fig1
Table SI. Raw data for Cul3 mRNA and protein expression.
Drug sensitivity assay comparing parental vs. drug-resistant cell lines
KKU-213A treated with 5-FU													KKU-213A treated with gemcitabine
5-FU (ug/mL)	OD-1	OD-2	OD-3	Average	SD	%1	%2	%3	Average	SD			Gemcitabine (ug/mL)	OD-1	OD-2	OD-3	Average	SD	%1	%2	%3	Average	SD
0	1.9087	1.9661	2.0486	1.97447	0.0703243	96.6691	99.5763	103.755	100	3.56168			0	1.4017	1.8292	1.5551	1.59533	0.216571	87.8625	114.659	97.4781	100	13.5753
3.125	0.928	1.0511	1.0342	1.00443	0.0667304	47	53.2346	52.3787	50.8711	3.37967			1.25	0.568	0.5562	0.547	0.557067	0.0105268	35.6038	34.8642	34.2875	34.9185	0.659849
6.25	0.8316	0.869	0.8773	0.8593	0.0243452	42.1177	44.0119	44.4323	43.5206	1.233			2.5	0.4931	0.5113	0.4584	0.4876	0.0268755	30.9089	32.0497	28.7338	30.5641	1.68463
12.5	0.6841	0.7249	0.7331	0.714033	0.0262453	34.6473	36.7137	37.129	36.1634	1.32923			5	0.3019	0.3382	0.51	0.383367	0.111159	18.9239	21.1993	31.9682	24.0305	6.96779
25	0.5458	0.5808	0.5679	0.564833	0.0177004	27.6429	29.4155	28.7622	28.6069	0.896464			10	0.3508	0.3613	0.3029	0.338333	0.031132	21.9891	22.6473	18.9866	21.2077	1.95144
KKU-213A-FR treated with 5-FU													KKU-213A-GR treated with gemcitabine
5-FU (ug/mL)	OD-1	OD-2	OD-3	Average	SD	%1	%2	%3	Average	SD	T-test (p)		Gemcitabine (ug/mL)	OD-1	OD-2	OD-3	Average	SD	%1	%2	%3	Average	SD	T-test (p)
0	1.3563	1.5898	1.4591	1.4684	0.117027	92.3658	108.268	99.3667	100	7.96973			0	0.914	0.881	0.9292	0.908067	0.0246417	100.653	97.0193	102.327	100	2.71364
3.125	1.1149	1.0965	1.0944	1.10193	0.0112784	75.9262	74.6731	74.5301	75.0431	0.768077	0.000269345		1.25	0.5462	0.5834	0.5238	0.551133	0.0301047	60.1498	64.2464	57.683	60.693	3.31525	0.000189905
6.25	0.8524	0.8512	0.8369	0.846833	0.00862342	58.0496	57.9679	56.994	57.6705	0.587266	5.66764e-05		2.5	0.5014	0.5198	0.4881	0.5031	0.0159182	55.2162	57.2425	53.7516	55.4034	1.75298	5.99063e-05
12.5	0.7855	0.6533	0.6927	0.7105	0.0678737	53.4936	44.4906	47.1738	48.386	4.62229	0.0116762		5	0.4513	0.4622	0.3924	0.4353	0.0375501	49.699	50.8993	43.2127	47.937	4.13517	0.00693193
25	0.5254	0.5713	0.5128	0.5365	0.0307891	35.7804	38.9063	34.9224	36.5364	2.09678	0.00382893		10	0.3508	0.3613	0.5029	0.405	0.0849463	38.6315	39.7878	55.3814	44.6002	9.35463	0.013264
Cul 3 mRNA expression in drug-resistant CCA cells by RT-qPCR
Gene		Sample	Ct1	Ct2	Ct3	∆Ct-1	∆Ct-2	∆Ct-3	2^∆Ct-1	2^∆Ct-2	2^∆Ct-3	AVG	SD	Fold-1	Fold-2	Fold-3	AVG	SD
ACTB	KKU-213A	213A	14.43	14.83	14.63
	KKU-213A-FR	213A-FR	15.04	14.89	15.46
	KRKU-213A-GR	213A-GR	14.29	14.41	14.17
CUL3	KKU-213A	213A	21	20.78	20.94	-6.37	-6.15	-6.31	0.0120904	0.014082	0.0126038	0.0129254	0.00103406	0.935396	1.08949	0.975118	1	0.0800022
	KKU-213A-FR	213A-FR	20	19.96	20.05	-4.87	-4.83	-4.92	0.0341967	0.0351581	0.0330318	0.0341289	0.00106475	2.6457	2.72008	2.55558	2.64045	0.0823769
	KRKU-213A-GR	213A-GR	19.2	19.22	19.24	-4.91	-4.93	-4.95	0.0332616	0.0328036	0.032352	0.0328057	0.000454773	2.57335	2.53792	2.50298	2.53809	0.0351845
Cul 3 protein expression in drug-resistant CCA cells by Western blot
	Intensity			blank substraction
CUL3	IntDen1	IntDen2	IntDen3	IntDen1	IntDen2	IntDen3	Fold1	Fold2	Fold3	Average	SD
213A	256.262	272.603	39.888	247.033	263.374	20.447	1	1	1	1	1.57009e-16
213A-FR	523.938	576.347	57.268	514.709	567.118	37.827	2.08356	2.15328	1.85	2.02895	0.158844
213A-GR	455.418	567.065	56.775	446.189	557.836	37.334	1.80619	2.11804	1.82589	1.91671	0.174635
Knockdwon Cul 3 (mRNA expression by RT-qPCR)
Gene		Sample	Ct1	Ct2	Ct3	∆Ct-1	∆Ct-2	∆Ct-3	2^∆Ct-1	2^∆Ct-2	2^∆Ct-3	AVG	SD	Fold-1	Fold-2	Fold-3	AVG	SD
ACTB	KKU-213A-FR	siNC	14.71	14.43	14.41
		siCul3#1	15.24	15.09	15.05
		siCul3#2	14.82	14.71	14.84
CUL3		siNC	18.06	18.41	18.32	-3.54	-3.89	-3.8	0.0859714	0.0674518	0.0717936	0.0750723	0.00968534	1.14518	0.898491	0.956327	1	0.129014
		siCul3#1	20.08	20.33	20.38	-4.95	-5.2	-5.25	0.032352	0.0272047	0.026278	0.0286116	0.00327229	0.430945	0.36238	0.350036	0.381121	0.0435886
		siCul3#2	20.31	19.95	19.81	-5.52	-5.16	-5.02	0.0217929	0.0279695	0.0308198	0.0268607	0.00461447	0.290292	0.372568	0.410535	0.357798	0.061467
ACTB	KKU-213A-GR	siNC	15.28	15.2	15.21
		siCul3#1	14.71	14.83	14.93
		siCul3#2	13.74	13.6	13.71
CUL3		siNC	20.1	19.93	19.87	-4.87	-4.7	-4.64	0.0341967	0.0384733	0.0401071	0.0375923	0.00305208	0.909672	1.02343	1.06689	1	0.0811888
		siCul3#1	20.5	20.2	20.23	-5.68	-5.38	-5.41	0.0195052	0.0240137	0.0235195	0.0223461	0.0024727	0.51886	0.638792	0.625646	0.594433	0.0657768
		siCul3#2	19.32	19.42	19.44	-5.64	-5.74	-5.76	0.0200535	0.0187106	0.018453	0.0190724	0.000859405	0.533447	0.497724	0.490872	0.507348	0.0228612
Knockdwon Cul 3 protein expression (by Western blot)
		Intensity			blank substraction
		IntDen1	IntDen2	IntDen3	IntDen1	IntDen2	IntDen3	Fold1	Fold2	Fold3	Average	SD
213A-FR	siNC	0.388	0.294	0.241	0.275	0.205	0.152	1	1	1	1	0
	siCul3#1	0.212	0.195	0.184	0.099	0.106	0.095	0.36	0.517073	0.625	0.500691	0.133257
	siCul3#2	0.203	0.165	0.142	0.09	0.076	0.053	0.327273	0.370732	0.348684	0.348896	0.0217303
213A-GR	siNC	58226	18139	23248	51107	14698	19997	1	1	1	1	0
	siCul3#1	30872	11420	18430	23753	7979	15179	0.46477	0.542863	0.759064	0.588899	0.152452
	siCul3#2	18606	10418	8950	11487	6977	5699	0.224764	0.47469	0.284993	0.328149	0.130433

## Sheet: ANOVA-post hoc-Fig1D
Cul 3 mRNA expression in drug-resistant CCA cells by RT-qPCR
Gene		Sample	Ct1	Ct2	Ct3	∆Ct-1	∆Ct-2	∆Ct-3	2^∆Ct-1	2^∆Ct-2	2^∆Ct-3	AVG	SD	Fold-1	Fold-2	Fold-3	AVG	SD
ACTB	KKU-213A	213A	14.43	14.83	14.63
	KKU-213A-FR	213A-FR	15.04	14.89	15.46
	KRKU-213A-GR	213A-GR	14.29	14.41	14.17
CUL3	KKU-213A	213A	21	20.78	20.94	-6.37	-6.15	-6.31	0.0120904	0.014082	0.0126038	0.0129254	0.00103406	0.935396	1.08949	0.975118	1	0.0800022
	KKU-213A-FR	213A-FR	20	19.96	20.05	-4.87	-4.83	-4.92	0.0341967	0.0351581	0.0330318	0.0341289	0.00106475	2.6457	2.72008	2.55558	2.64045	0.0823769
	KRKU-213A-GR	213A-GR	19.2	19.22	19.24	-4.91	-4.93	-4.95	0.0332616	0.0328036	0.032352	0.0328057	0.000454773	2.57335	2.53792	2.50298	2.53809	0.0351845
Statistic analysis
Descriptives (Fold)
	N	Mean	Std. Deviation	Std. Error	95% Confidence Interval for Mean		Minimum	Maximum
					Lower Bound	Upper Bound
KKU-213A	3	0.999667	0.0799083	0.0461351	0.801163	1.19817	0.935	1.089
KKU-213A-FR	3	2.64067	0.08213	0.0474178	2.43664	2.84469	2.556	2.72
KKU-213A-GR	3	2.538	0.035	0.0202073	2.45106	2.62494	2.503	2.573
Total	9	2.05944	0.798327	0.266109	1.4458	2.67309	0.935	2.72
Tests of Homogeneity of Variances
		Levene Statistic	df1	df2	Sig.
Fold	Based on Mean	1.05447	2	6	0.405099
	Based on Median	0.439897	2	6	0.663327
	Based on Median and with adjusted df	0.439897	2	4.40382	0.669616
	Based on trimmed mean	1.00682	2	6	0.419725
ANOVA (Fold)
	Sum of Squares	df	Mean Square	F	Sig.
Between Groups	5.06989	2	2.53495	529.745	1.78569e-07	***
Within Groups	0.0287113	6	0.00478522
Total	5.0986	8
Post Hoc Tests
Multiple Comparisons
Dependent Variable: Fold
Scheffe
(I) Cul3	(J) Cul3	Mean Difference (I-J)	Std. Error	Sig.	95% Confidence Interval
					Lower Bound	Upper Bound
KKU-213A	KKU213AFR	-1.641000*	0.0564814	3.51566e-07	-1.82215	-1.45985	***
	KKU213AGR	-1.538333*	0.0564814	5.16521e-07	-1.71948	-1.35718	***
KKU-213A-FR	KKU213A	1.641000*	0.0564814	3.51566e-07	1.45985	1.82215
	KKU213AGR	0.102667	0.0564814	0.268186	-0.0784838	0.283817
KKU-213A-GR	KKU213A	1.538333*	0.0564814	5.16521e-07	1.35718	1.71948
	KKU213AFR	-0.102667	0.0564814	0.268186	-0.283817	0.0784838
*. The mean difference is significant at the 0.05 level.
Homogeneous Subsets
Fold
Scheffea
Cul3	N	Subset for alpha = 0.05
		1	2
KKU-213A	3	0.999667
KKU-213A-FR	3		2.538
KKU-213A-GR	3		2.64067
Sig.		1	0.268186
Means for groups in homogeneous subsets are displayed.

## Sheet: ANOVA-post hoc-Fig1E
Cul 3 protein expression in drug-resistant CCA cells by Western blot
	Intensity			blank substraction
CUL3	IntDen1	IntDen2	IntDen3	IntDen1	IntDen2	IntDen3	Fold1	Fold2	Fold3	Average	SD
213A	256.262	272.603	39.888	247.033	263.374	20.447	1	1	1	1	1.57009e-16
213A-FR	523.938	576.347	57.268	514.709	567.118	37.827	2.08356	2.15328	1.85	2.02895	0.158844
213A-GR	455.418	567.065	56.775	446.189	557.836	37.334	1.80619	2.11804	1.82589	1.91671	0.174635
Statistic analysis
Descriptives (Fold)
	N	Mean	Std. Deviation	Std. Error	95% Confidence Interval for Mean		Minimum	Maximum
					Lower Bound	Upper Bound
KKU-213A	3	1	0	0	1	1	1	1
KKU-213A-FR	3	2.029	0.158811	0.0916897	1.63449	2.42351	1.85	2.153
KKU-213A-GR	3	1.91667	0.174646	0.100832	1.48282	2.35051	1.806	2.118
Total	9	1.64856	0.502889	0.16763	1.262	2.03511	1	2.153
Tests of Homogeneity of Variances
		Levene Statistic	df1	df2	Sig.
Fold	Based on Mean	6.63871	2	6	0.0301513
	Based on Median	0.768026	2	6	0.504687
	Based on Median and with adjusted df	0.768026	2	3.67798	0.52635
	Based on trimmed mean	5.65595	2	6	0.0416312
ANOVA
	Sum of Squares	df	Mean Square	F	Sig.
Between Groups	1.91174	2	0.955869	51.4624	0.000167137	***
Within Groups	0.111445	6	0.0185741
Total	2.02318	8
Post Hoc Tests
Multiple Comparisons
Dependent Variable: Fold
Scheffe
(I) Cul3	(J) Cul3	Mean Difference (I-J)	Std. Error	Sig.	95% Confidence Interval
					Lower Bound	Upper Bound
KKU-213A	KKU213AFR	-1.029000*	0.111278	0.000281875	-1.3859	-0.672103	***
	KKU213AGR	-.916667*	0.111278	0.000536102	-1.27356	-0.55977	***
KKU-213A-FR	KKU213A	1.029000*	0.111278	0.000281875	0.672103	1.3859
	KKU213AGR	0.112333	0.111278	0.624621	-0.244563	0.46923
KKU-213A-GR	KKU213A	.916667*	0.111278	0.000536102	0.55977	1.27356
	KKU213AFR	-0.112333	0.111278	0.624621	-0.46923	0.244563
*. The mean difference is significant at the 0.05 level.
Homogeneous Subsets
Fold
Scheffea
Cul3	N	Subset for alpha = 0.05
		1	2
KKU-213A	3	1
KKU-213A-FR	3		1.91667
KKU-213A-GR	3		2.029
Sig.		1	0.624621
Means for groups in homogeneous subsets are displayed.

## Sheet: ANOVA-post hoc-Fig1F
Knockdwon Cul 3 (mRNA expression by RT-qPCR)
Gene		Sample	Ct1	Ct2	Ct3	∆Ct-1	∆Ct-2	∆Ct-3	2^∆Ct-1	2^∆Ct-2	2^∆Ct-3	AVG	SD	Fold-1	Fold-2	Fold-3	AVG	SD	p value
ACTB	KKU-213A-FR	siNC	14.71	14.43	14.41
		siCul3#1	15.24	15.09	15.05
		siCul3#2	14.82	14.71	14.84
CUL3		siNC	18.06	18.41	18.32	-3.54	-3.89	-3.8	0.0859714	0.0674518	0.0717936	0.0750723	0.00968534	1.14518	0.898491	0.956327	1	0.129014
		siCul3#1	20.08	20.33	20.38	-4.95	-5.2	-5.25	0.032352	0.0272047	0.026278	0.0286116	0.00327229	0.430945	0.36238	0.350036	0.381121	0.0435886	0.0014079
		siCul3#2	20.31	19.95	19.81	-5.52	-5.16	-5.02	0.0217929	0.0279695	0.0308198	0.0268607	0.00461447	0.290292	0.372568	0.410535	0.357798	0.061467	0.00146929
ACTB	KKU-213A-GR	siNC	15.28	15.2	15.21
		siCul3#1	14.71	14.83	14.93
		siCul3#2	13.74	13.6	13.71
CUL3		siNC	20.1	19.93	19.87	-4.87	-4.7	-4.64	0.0341967	0.0384733	0.0401071	0.0375923	0.00305208	0.909672	1.02343	1.06689	1	0.0811888
		siCul3#1	20.5	20.2	20.23	-5.68	-5.38	-5.41	0.0195052	0.0240137	0.0235195	0.0223461	0.0024727	0.51886	0.638792	0.625646	0.594433	0.0657768	0.00254957
		siCul3#2	19.32	19.42	19.44	-5.64	-5.74	-5.76	0.0200535	0.0187106	0.018453	0.0190724	0.000859405	0.533447	0.497724	0.490872	0.507348	0.0228612	0.000537321
Statistic analysis from fold
Descriptives (Fold)
		N	Mean	Std. Deviation	Std. Error	95% Confidence Interval for Mean		Minimum	Maximum
						Lower Bound	Upper Bound
KKU213AFR	siNC	3	1	0.129014	0.074486	0.679512	1.32049	0.898491	1.14518
	siCul3#1	3	0.381121	0.0435886	0.0251659	0.272841	0.489401	0.350036	0.430945
	siCul3#2	3	0.357798	0.061467	0.035488	0.205106	0.510491	0.290292	0.410535
	Total	9	0.57964	0.324157	0.108052	0.33047	0.828809	0.290292	1.14518
KKU213AGR	siNC	3	1	0.0811888	0.0468744	0.798316	1.20168	0.909672	1.06689
	siCul3#1	3	0.594433	0.0657768	0.0379763	0.431034	0.757831	0.51886	0.638792
	siCul3#2	3	0.507348	0.0228612	0.0131989	0.450557	0.564138	0.490872	0.533447
	Total	9	0.700593	0.233895	0.0779652	0.520805	0.880381	0.490872	1.06689
Tests of Homogeneity of Variances
		Levene Statistic	df1	df2	Sig.
KKU213AFR	Based on Mean	2.8768	2	6	0.133027
	Based on Median	0.605385	2	6	0.576115
	Based on Median and with adjusted df	0.605385	2	3.32786	0.596718
	Based on trimmed mean	2.59987	2	6	0.153755
KKU213AGR	Based on Mean	2.60208	2	6	0.153573
	Based on Median	0.485373	2	6	0.637699
	Based on Median and with adjusted df	0.485373	2	4.41521	0.644849
	Based on trimmed mean	2.32073	2	6	0.179247
ANOVA (Fold)
		Sum of Squares	df	Mean Square	F	Sig.
KKU213AFR	Between Groups	0.795979	2	0.397989	53.4868	0.000149804	***
	Within Groups	0.0446453	6	0.00744089
	Total	0.840624	8
KKU213AGR	Between Groups	0.414775	2	0.207388	54.3808	0.000142911	***
	Within Groups	0.0228817	6	0.00381362
	Total	0.437657	8
Post Hoc Tests
Multiple Comparisons
Scheffe
Dependent Variable	(I) Knockdown	(J) Knockdown	Mean Difference (I-J)	Std. Error	Sig.	95% Confidence Interval
						Lower Bound	Upper Bound
KKU213AFR	siNC	siCul3#1	.6188794*	0.0704315	0.000374898	0.392987	0.844771	***
		siCul3#2	.6422017*	0.0704315	0.000304956	0.41631	0.868094	***
	siCul3#1	siNC	-.6188794*	0.0704315	0.000374898	-0.844771	-0.392987
		siCul3#2	0.0233223	0.0704315	0.947119	-0.20257	0.249214
	siCul3#2	siNC	-.6422017*	0.0704315	0.000304956	-0.868094	-0.41631
		siCul3#1	-0.0233223	0.0704315	0.947119	-0.249214	0.20257
KKU213AGR	siNC	siCul3#1	.4055674*	0.0504223	0.00061131	0.24385	0.567285	***
		siCul3#2	.4926524*	0.0504223	0.00020679	0.330935	0.65437	***
	siCul3#1	siNC	-.4055674*	0.0504223	0.00061131	-0.567285	-0.24385
		siCul3#2	0.0870849	0.0504223	0.297991	-0.0746325	0.248802
	siCul3#2	siNC	-.4926524*	0.0504223	0.00020679	-0.65437	-0.330935
		siCul3#1	-0.0870849	0.0504223	0.297991	-0.248802	0.0746325
*. The mean difference is significant at the 0.05 level.
Homogeneous Subsets
KKU213AFR
Scheffea
Knockdown	N	Subset for alpha = 0.05
		1 (a)	2 (b)
siCul3#2	3	0.357798
siCul3#1	3	0.381121
siNC	3		1
Sig.		0.947119	1
Means for groups in homogeneous subsets are displayed.
KKU213AGR
Scheffea
Knockdown	N	Subset for alpha = 0.05
		1	2
siCul3#2	3	0.507348
siCul3#1	3	0.594433
siNC	3		1
Sig.		0.297991	1
Means for groups in homogeneous subsets are displayed.

## Sheet: ANOVA-post hoc-Fig1G
Knockdwon Cul 3 protein expression (by Western blot)
		Intensity			blank substraction
		IntDen1	IntDen2	IntDen3	IntDen1	IntDen2	IntDen3	Fold1	Fold2	Fold3	Average	SD
213A-FR	siNC	0.388	0.294	0.241	0.275	0.205	0.152	1	1	1	1	0
	siCul3#1	0.212	0.195	0.184	0.099	0.106	0.095	0.36	0.517073	0.625	0.500691	0.133257
	siCul3#2	0.203	0.165	0.142	0.09	0.076	0.053	0.327273	0.370732	0.348684	0.348896	0.0217303
213A-GR	siNC	58226	18139	23248	51107	14698	19997	1	1	1	1	0
	siCul3#1	30872	11420	18430	23753	7979	15179	0.46477	0.542863	0.759064	0.588899	0.152452
	siCul3#2	18606	10418	8950	11487	6977	5699	0.224764	0.47469	0.284993	0.328149	0.130433
Statistic analysis KKU-213-FR														Statistic analysis KKU-213A-GR
Descriptives (Fold)														Descriptives (Fold)
KKU-213A-FR	N	Mean	Std. Deviation	Std. Error	95% Confidence Interval for Mean		Minimum	Maximum						KKU-213A-GR	N	Mean	Std. Deviation	Std. Error	95% Confidence Interval for Mean		Minimum	Maximum
					Lower Bound	Upper Bound													Lower Bound	Upper Bound
siNC	3	1	0	0	1	1	1	1						siNC	3	1	0	0	1	1	1	1
siCul3#1	3	0.500691	0.133257	0.0769362	0.169661	0.831721	0.36	0.625						siCul3#1	3	0.588899	0.152452	0.0880184	0.210186	0.967611	0.46477	0.759064
siCul3#2	3	0.348896	0.0217303	0.012546	0.294915	0.402877	0.327273	0.370732						siCul3#2	3	0.328149	0.130433	0.0753053	0.00413623	0.652162	0.224764	0.47469
Total	9	0.616529	0.302644	0.100881	0.383896	0.849162	0.327273	1						Total	9	0.639016	0.310018	0.103339	0.400715	0.877317	0.224764	1
Tests of Homogeneity of Variances														Tests of Homogeneity of Variances
KKU-213A-FR		Levene Statistic	df1	df2	Sig.									KKU-213A-GR		Levene Statistic	df1	df2	Sig.
Fold	Based on Mean	4.86262	2	6	0.0555471									Fold	Based on Mean	5.12392	2	6	0.0503578
	Based on Median	3.05425	2	6	0.12167										Based on Median	1.17734	2	6	0.370395
	Based on Median and with adjusted df	3.05425	2	2.09752	0.239159										Based on Median and with adjusted df	1.17734	2	3.94216	0.397288
	Based on trimmed mean	4.74232	2	6	0.0581768										Based on trimmed mean	4.66459	2	6	0.0599648
ANOVA (Fold)														ANOVA (Fold)
	Sum of Squares	df	Mean Square	F	Sig.										Sum of Squares	df	Mean Square	F	Sig.
Between Groups	0.696287	2	0.348144	57.2927	0.000123188	***								Between Groups	0.688378	2	0.344189	25.6511	0.001148	**
Within Groups	0.0364595	6	0.00607658											Within Groups	0.0805088	6	0.0134181
Total	0.732747	8												Total	0.768887	8
Post Hoc Tests														Post Hoc Tests
Multiple Comparisons														Multiple Comparisons
Dependent Variable: Fold														Dependent Variable: Fold
Scheffe														Scheffe
(I) KKU-213A-FR	(J) KKU-213A-FR	Mean Difference (I-J)	Std. Error	Sig.	95% Confidence Interval									(I) KKU-213A-GR	(J)KKU-213A-GR	Mean Difference (I-J)	Std. Error	Sig.	95% Confidence Interval
					Lower Bound	Upper Bound													Lower Bound	Upper Bound
siNC	siCul3#1	.4993089*	0.0636479	0.000701026	0.295174	0.703444	***							siNC	siCul3#1	.4111011*	0.0945802	0.0140034	0.107758	0.714444	*
	siCul3#2	.6511038*	0.0636479	0.000159448	0.446969	0.855239	***								siCul3#2	.6718510*	0.0945802	0.00120015	0.368508	0.975194	**
siCul3#1	siNC	-.4993089*	0.0636479	0.000701026	-0.703444	-0.295174	***							siCul3#1	siNC	-.4111011*	0.0945802	0.0140034	-0.714444	-0.107758
	siCul3#2	0.151795	0.0636479	0.135286	-0.0523403	0.35593									siCul3#2	0.26075	0.0945802	0.0858578	-0.0425932	0.564093
siCul3#2	siNC	-.6511038*	0.0636479	0.000159448	-0.855239	-0.446969	***							siCul3#2	siNC	-.6718510*	0.0945802	0.00120015	-0.975194	-0.368508
	siCul3#1	-0.151795	0.0636479	0.135286	-0.35593	0.0523403									siCul3#1	-0.26075	0.0945802	0.0858578	-0.564093	0.0425932
*. The mean difference is significant at the 0.05 level.														*. The mean difference is significant at the 0.05 level.
Homogeneous Subsets														Homogeneous Subsets
Fold														Fold
Scheffea														Scheffea
KKU-213A-FR	N	Subset for alpha = 0.05												KKU-213A-GR	N	Subset for alpha = 0.05
		1	2													1	2
siCul3#2	3	0.348896												siCul3#2	3	0.328149
siCul3#1	3	0.500691												siCul3#1	3	0.588899
siNC	3		1											siNC	3		1
Sig.		0.135286	1											Sig.		0.0858578	1
Means for groups in homogeneous subsets are displayed.														Means for groups in homogeneous subsets are displayed.
